# Supplementary material
Source: Springer Nature journal article supplement (https://www.springermedizin.de/resource/supplementary/12906_2012_1251_MOESM3_ESM.pdf/9520040)

## A) Modified Y-maze test

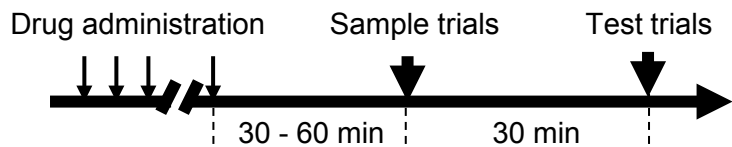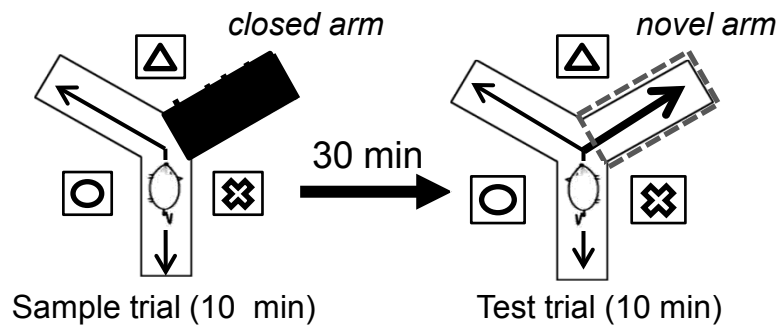

## B) Time in novel arm

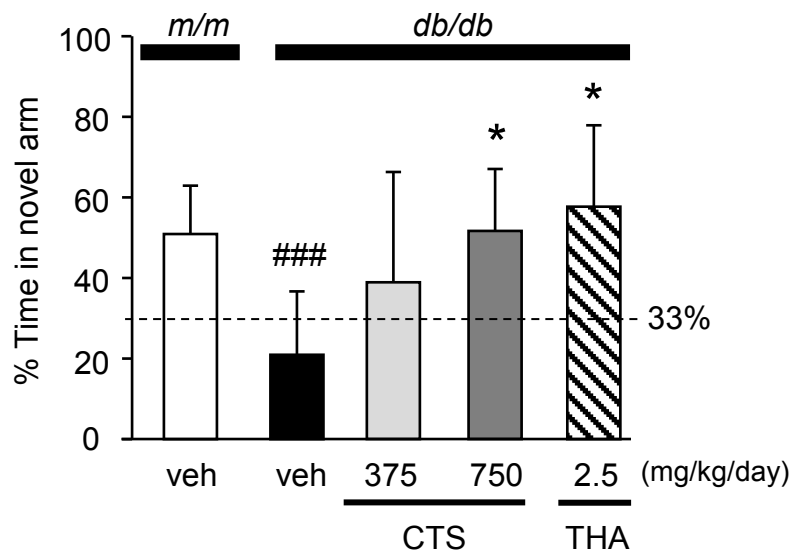

## C) Locomotor activity

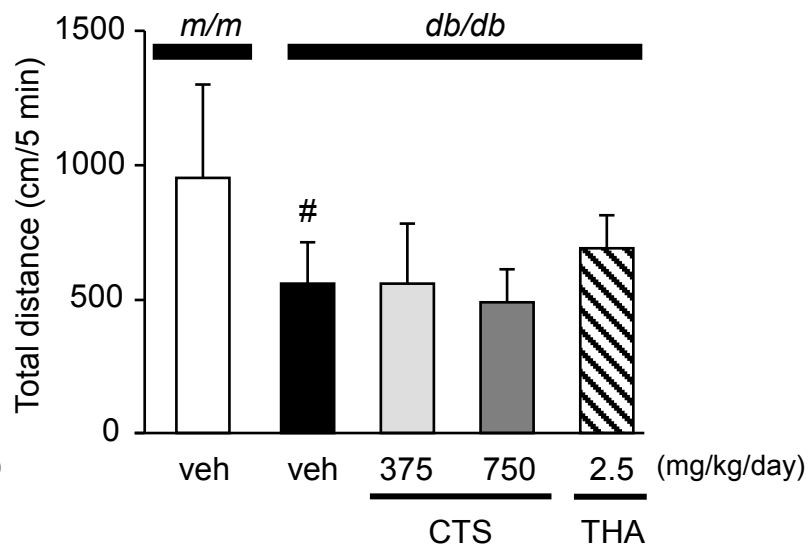

Supplement: MOESM3 [file 9520040]
